# Supplementary material for: Mistranslating refuge crops: analyzing policy mobilities in the context of Indian Bt cotton production
Source: Copernicus journal article supplement (doi:10.5194/gh-77-213-2022), 2022-05-18
Supplement: Supplementary file 1 [file gh-77-213-2022-supplement.pdf]

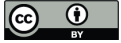

*Supplement of*

## **Mistranslating refuge crops: analyzing policy mobilities in the context of Indian Bt cotton production**

**Katharina Najork and Markus Keck**

*Correspondence to:* Katharina Najork ([katharina.najork@uni-goettingen.de](mailto:katharina.najork@uni-goettingen.de))

The copyright of individual parts of the supplement might differ from the article licence.

## Supplementary Information

Our data results from a representative survey (n=457) which we conducted in August and September 2019 in Telangana's three highest ranking districts regarding the criteria 'total cotton area', 'area under cotton to total area sown', and 'out-turn' (Government of Telangana 2017, p. 118-120)<sup>1</sup>. We then selected those three mandals<sup>2</sup> per district featuring the highest percentage of area under cotton to the total area sown (Agricultural Office Adilabad 2014; Agricultural Office Nalgonda 2015; Agricultural Office Warangal 2014). We then randomly selected five villages per district within the determined mandals in the range of 1,000 to 6,000 inhabitants and calculated representative sample sizes for each village according to its Indian Census Data's population size (Government of India 2011). Households were found via random walks and interviewed by six Telugu speaking surveyors. Of the 457 interviewed HHs, 446 were led by a male and 11 by a female. The interviewed 457 HHs had an average size of 4.3 people.

We provide the results of univariate and bivariate statistic analyses, examined by means of  $\chi^2$ -tests and quantified by Cramer's V ( $\phi$ ) ( $p \leq \alpha \leq 0.05$ ) correlation coefficients (De Lange and Nipper 2018). We further conducted a two-step cluster analysis as this allows the simultaneous inclusion of variables of different scale levels (Fromm 2012; Lange & Nipper 2018).

*Table S1: Sample Composition*

| District | Mandal      | Village | Population | No. HHs | n  |
|----------|-------------|---------|------------|---------|----|
| Adilabad | Wankdi      | 1       | 1009       | 223     | 10 |
| Adilabad | Wankdi      | 2       | 1854       | 405     | 18 |
| Adilabad | Kagaznagar  | 3       | 2665       | 687     | 31 |
| Adilabad | Kagaznagar  | 4       | 2304       | 575     | 26 |
| Adilabad | Bhimini     | 5       | 1292       | 344     | 16 |
| Warangal | Parkal      | 6       | 3261       | 853     | 38 |
| Warangal | Duggondi    | 7       | 3729       | 1026    | 46 |
| Warangal | Duggondi    | 8       | 2761       | 743     | 33 |
| Warangal | Duggondi    | 9       | 2723       | 730     | 33 |
| Warangal | Duggondi    | 10      | 3305       | 953     | 43 |
| Nalgonda | Chandur     | 11      | 2907       | 759     | 34 |
| Nalgonda | Chandur     | 12      | 2147       | 501     | 23 |
| Nalgonda | Devarakonda | 13      | 2796       | 665     | 30 |

---

<sup>1</sup> Since no other data was available at the time of our survey, all data used in the sampling procedure refer to the erstwhile districts and village structures of Telangana before they were restructured in 2016.

<sup>2</sup> A mandal is the administrative division subordinate to a district.

|          |             |    |      |      |    |
|----------|-------------|----|------|------|----|
| Nalgonda | Narayanapu  | 14 | 5663 | 1415 | 63 |
| Nalgonda | Narayanapur | 15 | 1173 | 288  | 13 |

### Qualitative data:

Table S2: List of qualitative interviews

| No*     | Name                                  | Expertise          | Landholding size                                       | Date     |
|---------|---------------------------------------|--------------------|--------------------------------------------------------|----------|
| V01-I01 | <b>Mari Jagan</b> (m)                 | Peasant            | 11 acres owned: paddy, cotton, chili                   | 10.09.18 |
| V01-I02 | <b>Mahendra</b> (m)                   | Peasant            | 7.5 acres owned: paddy, cotton                         | 11.09.18 |
| V01-I03 | <b>Mamatha</b> (f)                    | Peasant            | 7.5 acres owned: paddy, cotton                         | 11.09.18 |
| V01-I04 | <b>Karmagala Lakshmi</b> (m)          | Peasant            | 11 acres owned: paddy, cotton, turmeric                | 11.09.18 |
| V01-I05 | <b>Parameshwari</b> (f)               | Peasant            | 11 acres owned: paddy, cotton, turmeric                | 11.09.18 |
| V01-I06 | <b>Mari Jagan</b> (m)                 | Peasant            | 11 acres owned: paddy, cotton, chili                   | 11.09.18 |
| V01-I07 | <b>Lavanya</b> (f)                    | Peasant            | 11 acres owned: cotton, maize, turmeric                | 11.09.18 |
| T01-I01 | <b>Satish</b> (m)                     | KVK representative |                                                        | 12.09.18 |
| T01-I02 | <b>Mukka</b> (m)                      | Cotton mill owner  |                                                        | 12.09.18 |
| V01-I08 | <b>J. Mala</b> (m)                    | Peasant            | No owned land, hired laborers                          | 12.09.18 |
| V01-I09 | <b>Gujala</b> (f)                     | Peasant            | No owned land, hired laborers                          | 12.09.18 |
| V01-I10 | <b>Pulajillala</b> (f)                | Peasant            | No owned land, hired laborers                          | 12.09.18 |
| T01-I03 | <b>Krishnamurthy Ch.</b> (m)          | Inputs shop owner  |                                                        | 13.09.18 |
| V01-I11 | <b>Jelander</b> (m)                   | Peasant            | 1 acre owned: cotton, paddy                            | 13.09.18 |
| V01-I12 | <b>Rama</b> (f)                       | Peasant            | 50 guntas owned: cotton, paddy                         | 13.09.18 |
| T01-I04 | <b>Tirupaddy</b> (m)                  | Commission agent   |                                                        | 14.09.18 |
| V02-I01 | <b>P. Ravindar</b> (m)                | Peasant            | 6.5 acres owned: cotton, paddy, on lease               | 17.09.18 |
| V02-I02 | <b>Ram</b> (m)                        | Peasant            | 3 acres owned: cotton, paddy                           | 18.09.18 |
| V02-I03 | <b>Lakshmi Srinivas</b> (m)           | Sarpanch           |                                                        | 18.09.18 |
| V02-I04 | <b>Mugula</b> (m)                     | Peasant            | 8 acres: 4 acres owned, 4 acres leased: paddy, cotton  | 18.09.18 |
| V02-I05 | <b>Thirupati</b> (m)                  | Peasant            | 6 acres owned: cotton, paddy                           | 18.09.18 |
| V02-I06 | <b>Damodar</b> (m)                    | Peasant            | 1.5 acres owned: cotton                                | 18.09.18 |
| V02-I07 | <b>Mahindar</b> (m)                   | Peasant            | 4 acres owned: turmeric, chili, paddy, cotton          | 18.09.18 |
| V02-I08 | <b>Tirupati G.</b> (m)                | Peasant            | 5 acres: 2 acres owned, 3 acres leased: cotton, paddy  | 18.09.18 |
| V02-I09 | <b>Parusharam</b> (m)                 | Model farmer       | 10 acres: 5 acres owned, 5 acres leased: cotton, paddy | 19.09.18 |
| V02-I10 | <b>Md. Rahimodhin</b> (m)             | Peasant            | 4.5 acres: cotton, paddy                               | 19.09.18 |
| V02-I11 | <b>Kasturi</b> (m)                    | Peasant            | 8 acres: 6 acres owned, 2 acres leased: cotton, paddy  | 19.09.18 |
| V02-I12 | <b>N. Venkateshwarlu</b> (m)          | Peasant            | 24 acres owned: cotton, paddy, on lease                | 19.09.18 |
| V02-I13 | <b>Mohamad</b> (m), <b>Jarina</b> (f) | Peasants           | 2 acres owned: cotton, paddy                           | 19.09.18 |

|         |                                |                            |                                                               |          |
|---------|--------------------------------|----------------------------|---------------------------------------------------------------|----------|
| V02-I14 | <b>Sanjeev</b> (m)             | Peasant                    | 1 acre owned: cotton                                          | 19.09.18 |
| T02-I01 | <b>Vijay Reddy</b> (m)         | Inputs shop owner          |                                                               | 23.09.18 |
| V03-I01 | <b>N. Raju</b> (m)             | Peasant                    | 15 acres: 5 acres owned, 10 acres leased: cotton, maize       | 24.09.18 |
| V03-I02 | <b>Kalakonda Narasimha</b> (m) | Peasant                    | 20 acres owned: cotton, maize, paddy                          | 24.09.18 |
| V03-I03 | <b>C.H. Narayana</b> (m)       | Peasant                    | 5 acres: 4 acres owned, 1 acre leased: cotton                 | 24.09.18 |
| V03-I04 | <b>Ramana</b> (m)              | Peasant                    |                                                               | 24.09.18 |
| V03-I05 | <b>Karra Srinivas</b> (m)      | Peasant                    | 16 acres: 1 acre owned, 15 acres leased: cotton, maize, paddy | 24.09.18 |
| V03-I06 | <b>Chiluka</b> (m)             | Peasant                    | 8 acres: 6 acres owned, 2 acres leased: cotton, paddy         | 24.09.18 |
| V03-I07 | <b>Naran</b> (m)               | Peasant                    | 10.5 acres: 1.5 acres owned, 9 acres leased: cotton, maize    | 24.09.18 |
| V03-I08 | <b>Mandhala Linga</b> (m)      | Peasant                    | 18 acres owned: cotton, paddy                                 | 24.09.18 |
| V03-I09 | <b>Raj</b> (m)                 | Peasant                    | 9 acres: 6 acres owned, 3 acres leased: cotton, paddy         | 25.09.18 |
| V03-I10 | <b>Janardan</b> (m)            | Peasant                    | 6 acres owned: cotton, paddy                                  | 25.09.18 |
| T03-I01 | <b>Tharun</b> (m)              | Seed production enterprise |                                                               | 26.09.18 |

\* “V”stands for village; “T” stands for town; “I” stands for interview partner
